# Supplementary material
Source: Research Square preprint supplement (doi:10.21203/rs.3.rs-8688674/v1)
Supplement: Supplementary file 1 [file b76601a5cbf74dd54cb50eee.docx]

**Psychometric Properties of Research Instruments**

To ensure scientific credibility, the validity and reliability of the researcher-developed instruments were rigorously evaluated.

**1. Content Validity**

Content validity was assessed quantitatively by a panel of 10 experts, including faculty members and orthopedic surgeons. The Content Validity Ratio (CVR) and Content Validity Index (CVI) were calculated based on Lawshe’s table (minimum acceptable CVR = 0.62) and Waltz & Bausell’s criteria (minimum acceptable CVI = 0.79).

- **Orthopedic Surgical Technology Knowledge Test:** The total mean CVR was 0.815, and the mean CVI was 0.892. All 40 items exceeded the CVI threshold. Eleven items with a borderline CVR (0.60) were revised for clarity and retained due to their educational significance.
- **Educational Satisfaction Questionnaire:** The instrument demonstrated high validity with a total mean CVR of 0.85 and a mean CVI of 0.92.

**2. Reliability**

Reliability was assessed using the internal consistency method (Cronbach’s alpha) through a pilot study involving 35 students who were not part of the main study sample.

- **Orthopedic Surgical Technology Knowledge Test**: Cronbach’s alpha = 0.790
- **Educational Satisfaction Questionnaire:** Cronbach’s alpha = 0.819

Both instruments exceeded the acceptable reliability threshold of 0.70, confirming their suitability for the study.

**Orthopedic Surgical Technology Knowledge Test**

This instrument consists of 40 multiple-choice questions designed to assess perioperative nursing students' theoretical knowledge regarding orthopedic surgical technology, including anatomy, instrumentation, and surgical procedures.

**1. The Russell-Taylor rod, combined with a locking screw, is used to treat which fracture?**

a) Femoral shaft

b) Humeral shaft

c) Tibial shaft

d) Intertrochanteric fracture

**2. The Insall open surgery procedure is indicated for which of the following tears?**

a) PCL

b) ACL

c) Lateral meniscus

d) Medial meniscus

**3. What does the term 'Abduction' mean in joint movements?**

a) Flexing the joint

b) Straightening the joint

c) Moving a body part toward the midline

d) Moving a body part away from the midline

**4. During diagnostic shoulder arthroscopy, which structure is usually used as the first landmark for surgeon orientation?**

a) Glenoid labrum

b) Biceps tendon (long head)

c) Acromioclavicular (AC) joint

d) Posterior joint capsule

**5. What is the primary purpose of using a pneumatic tourniquet in orthopedic surgeries?**

a) To reduce patient pain during surgery

b) To provide a bloodless surgical field

c) To prevent surgical site infection

d) To immobilize the limb during surgery

**6. Which of the following is a type of diarthrodial (synovial) joint?**

a) Ball-and-Socket joint

b) Suture lines

c) Intervertebral joints

d) Symphysis pubis

**7. What happens to the bone in a Greenstick fracture?**

a) The bone shatters into multiple pieces.

b) The fracture line spirals around the bone.

c) One cortex of the bone bends, and the other cortex breaks.

d) The bone breaks and pierces the skin.

**8. Which of the following clamps is used in TKA to grasp knee cartilage/meniscus?**

a) Martin

b) Dandy

c) Kocher

d) Allis

**9. Which method is preferred for non-displaced femoral neck fractures?**

a) DHS

b) Cannulated screw fixation

c) Cancellous fixation

d) Traction

**10. A sugar tong splint is used to treat which fracture?**

a) Colles

b) Monteggia

c) Scaphoid fracture

d) Ulna fracture

**11. Which type of suture and needle is used for Achilles tendon repair?**

a) Ethibond 5 Cutting

b) Tricon 5 Cutting

c) Ethibond 5 Reverse Cutting

d) Ethibond 5 Round

**12. Which of the following is used to create a bloodless surgical field in the limbs?**

a) Esmarch bandage

b) Coban bandage

c) Stockinette

d) Webril

**13. In a Colles fracture, which bone is fractured?**

a) Proximal end of the humerus

b) Distal end of the radius

c) Femoral shaft

d) Medial malleolus of the tibia

**14. Which bone cell is responsible for resorption and breakdown of bone tissue?**

a) Osteoblast

b) Osteocyte

c) Osteoclast

d) Chondrocyte

**15. What is the treatment for Open book fractures?**

a) Usually treated non-surgically with rest

b) External fixation

c) Plate and screw

d) Trans-iliac rods

**16. Which characteristic is true regarding cancellous screws?**

a) The external diameter is smaller than cortical screws.

b) These screws have a thicker core.

c) The number of threads in a cancellous screw is usually higher than in a cortical screw.

d) A partially threaded screw is known as a 32 screw.

**17. Which of the following can be attributed to cortical screws?**

a) Threads are spaced further apart.

b) The core size is larger in this type of screw.

c) Used mostly in short bones.

d) Their tip is Self-tapping.

**18. Which of the following THA incisions causes less soft tissue damage?**

a) Posterolateral

b) Anterolateral

c) Anteromedial

d) Posteromedial

**19. Which instrument should be handed to the surgeon to remove the femoral head in THA?**

a) Corkscrew

b) Cookie cutter

c) Broach

d) Osteotome

**20. Which screw is used in a tibial plateau fracture?**

a) Cortical 6.5

b) Cancellous 6.5

c) Interference 6.5

d) Cannulated 6.5

**21. If a tibial fracture results in fragments entering the knee joint, which of the following is the treatment?**

a) Plate

b) IM Nail

c) External fixator

d) Traction

**22. What is the amount of bone reaming in IMF (Intramedullary Fixation)?**

a) 1.5 cm more than the nail diameter

b) 0.5 cm less than the nail diameter

c) 0.5 cm more than the nail diameter

d) 1 cm less than the nail diameter

**23. A Reconstruction plate is used in which of the following fractures?**

a) Femoral condyle

b) Femoral shaft

c) Pelvic

d) Radial shaft

**24. How much time is needed before performing internal fixation for acetabular fractures?**

a) 24 hours

b) 1-2 days

c) 3-10 days

d) Surgery should be done immediately.

**25. Which screw is used to treat unstable scaphoid fractures?**

a) Interference

b) Herbert

c) Acutrak

d) Cancellous

**26. Which of the following is a surgical method for hammer toe?**

a) Resecting the long extensor tendon of the toes and fusing the proximal interphalangeal joint

b) Detaching the proximal third of the proximal phalanx

c) Metatarsal osteotomy

d) Using a cancellous screw

**27. Which repair method is used in extensive olecranon fractures?**

a) Removing broken fragments and attaching the triceps tendon to the ulnar shaft

b) Reduction of fragments and internal fixation

c) Casting

d) Fixation with a cancellous screw

**28. In ACL repair, which of the following is used as the most common type of autograft?**

a) Iliotibial band

b) Semitendinosus tendon

c) Patellar tendon graft

d) Quadriceps tendon

**29. Which treatment method is indicated in humeral shaft fractures with supracondylar involvement?**

a) Compression plate

b) Lag screw

c) IM fixation

d) Locking nail

**30. In which of the following procedures is the internal part of the subscapularis sutured to the rotator cuff at the greater tubercle?**

a) Bankart

b) Bristow

c) Putti-Platt

d) Latarjet

**31. The Bankart procedure is indicated for the treatment of which of the following?**

a) Anterior shoulder dislocation

b) Posterior shoulder dislocation

c) Rotator cuff tear

d) Sternoclavicular dislocation

**32. Which of the following is an appropriate definition of the McBride surgical procedure for bunions?**

a) Fusion of interphalangeal joints

b) The medial surface of the exostosis is removed from the metatarsal head

c) The adductor tendon is attached to the lateral part of the metatarsal neck, and the sesamoid bone is removed.

d) The distal third of the distal phalanx of the big toe is removed in a triangular shape.

**33. Which of the following is a potentially serious complication caused by the use of bone cement?**

a) Compartment syndrome

b) Osteomyelitis

c) BCIS (Bone Cement Implantation Syndrome)

d) Avascular necrosis

**34. In which of the following cast types does the cast extend from the hip to the head?**

a) Cylinder

b) Hanging cast

c) Hip spica

d) Minerva jacket

**35. Which of the following instruments is used to evacuate the bone canal?**

a) Gouge

b) Chisel

c) Osteotome

d) Rasp/File

**36. Which type of shoulder arthroplasty is performed in a patient with a massive, irreparable rotator cuff tear?**

a) Hemiarthroplasty

b) Reverse Total Shoulder Arthroplasty

c) Anatomic Total Shoulder Arthroplasty

d) Arthrodesis

**37. What is the patient's position in total shoulder arthroplasty surgery?**

a) Sitting

b) Semi-sitting (Beach chair)

c) Lateral

d) Lateral decubitus

**38. For removing bone in amputation surgery, which of the following instruments may be used?**

a) Curette

b) Liston knife and Gigli saw

c) Kelly

d) Adson

**39. The Krackow whipstitch procedure is indicated for treating which of the following injuries?**

a) ACL tear

b) Achilles tear

c) Rotator cuff tear

d) Knee meniscus tear

**40. What is the maximum amount of acetabular reaming in THA?**

a) 1 mm

b) 2 mm

c) 3 mm

d) 4 mm

**Answer Key (Knowledge Test)**

| Q | Answer | Q | Answer | Q | Answer | Q | Answer |
| --- | --- | --- | --- | --- | --- | --- | --- |
| 1 | A | **11** | D | **21** | A | **31** | A |
| 2 | B | **12** | A | **22** | C | **32** | C |
| 3 | D | **13** | B | **23** | C | **33** | C |
| 4 | B | **14** | C | **24** | C | **34** | D |
| 5 | B | **15** | B | **25** | B | **35** | A |
| 6 | A | **16** | D | **26** | A | **36** | B |
| 7 | C | **17** | D | **27** | B | **37** | B |
| 8 | A | **18** | B | **28** | C | **38** | B |
| 9 | B | **19** | A | **29** | A | **39** | B |
| 10 | A | **20** | B | **30** | C | **40** | B |

**Educational Satisfaction Questionnaire**

This questionnaire was designed to evaluate student satisfaction with the AI-driven RAG system used in the Orthopedic Surgical Technology course. It consists of 20 items scored on a 5-point Likert scale.

*Dear Student,*

*This questionnaire aims to evaluate your satisfaction with the new intelligent educational system in the "Orthopedic Surgical Technology" course. Your precise and honest feedback will greatly assist us in improving and developing modern educational tools. Please read each question and select the option that best reflects your opinion. All your information will remain strictly confidential. Thank you sincerely for your cooperation.*

**Scoring Scale:**

(1) Strongly Disagree - (2) Disagree - (3) Neutral - (4) Agree - (5) Strongly Agree

1. Using this system helped improve the quality of my learning in the Orthopedic Surgical Technology course.
2. This tool increased the speed of my access to valid and accurate information regarding orthopedic surgeries.
3. I believe that regular use of this system improves my academic performance and grades in this course.
4. The content provided by the system deepened my understanding of orthopedic surgeries.
5. I consider this system a valuable study aid for success in this course.
6. Learning how to work with this system was simple and quick for me.
7. The system’s ability to correctly interpret my questions about surgical instruments and techniques is acceptable.
8. The answers and explanations provided by the system are clear and understandable.
9. I did not need much mental effort to find the information I required.
10. Interacting with the system and following the conversation to receive supplementary information is fluid and uncomplicated.
11. I felt confident and trusting when using the system to find sensitive surgical information.
12. I find the various functions of this system to be overly complex and unnecessary.
13. The information provided in different parts of the system appeared integrated and consistent.
14. I think I would need the support of a technical person to use this system effectively.
15. I found the system weak and slow when searching for complex concepts.
16. Using this tool increased my self-confidence in answering questions related to orthopedic surgery.
17. This system made the learning process of Orthopedic Surgical Technology more attractive and dynamic for me.
18. I intend to recommend using this system to other students.
19. With the help of this system, I feel more prepared to face the real operating room environment.
20. Working with this system stimulated my curiosity to learn surgical topics more deeply.
